# Supplementary material for: RADIv1: a non-steady-state early diagenetic model for ocean sediments in Julia and MATLAB/GNU Octave
Source: Copernicus journal article supplement (doi:10.5194/gmd-15-2105-2022), 2022-03-11
Supplement: Supplementary file 1 [file gmd-15-2105-2022-supplement.pdf]

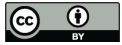

*Supplement of*

## **RADIV1: a non-steady-state early diagenetic model for ocean sediments in Julia and MATLAB/GNU Octave**

**Olivier Sulpis et al.**

*Correspondence to:* Olivier Sulpis (o.j.t.sulpis@uu.nl)

The copyright of individual parts of the supplement might differ from the article licence.

## **Contents of this file**

Full RADI equations

Using TAlk and  $\Sigma\text{CO}_2$  as solute variables, rather than their individual components

Tables S1 to S3

Figure S1

Figure S2

Figure S3

Supplementary references

## Full RADI equations

Below we detail Eq. (5) from the main text for readers interested in seeing its complete version. For solutes,

$$v_{(t+d\hat{t}),z} = v_{t,z} + \left[ R(v_{t,z}) + - \left( u_z - \frac{d_z(v)}{\varphi_z} \cdot \frac{d\varphi_z}{dz} - d^\circ(v) \cdot \frac{d(1/\theta_z^2)}{dz} \right) \cdot \frac{v_{(z+dz)} - v_{(z-dz)}}{2dz} \right. \\ \left. + d_z(v) \cdot \frac{v_{(z-dz)} - 2v_z + v_{(z+dz)}}{(dz)^2} + \alpha_z(v_w - v_z) \right] \cdot dt$$

and for solids,

$$v_{(t+d\hat{t}),z} = v_{t,z} + \left[ R(v_{t,z}) + - \left( w_z - \frac{db_z}{dz} - \frac{b_z}{\varphi_{s,z}} \cdot \frac{d\varphi_{s,z}}{dz} \right) \cdot \frac{(1 - \sigma_z)v_{(z+dz)} + 2\sigma_z v_z - (1 + \sigma_z)v_{(z-dz)}}{2dz} \right. \\ \left. + d_z(v) \cdot \frac{v_{(z-dz)} - 2v_z + v_{(z+dz)}}{(dz)^2} \right] \cdot dt$$

## Using TAlk and $\Sigma\text{CO}_2$ as solute variables, rather than their individual components

Transport-reaction modelling of the carbonate system is challenging, and trade-offs must be made (e.g., Boudreau, 1997; Hoffmann et al., 2008). Modelling the carbonate system in the water column normally involves transport of total alkalinity and total dissolved inorganic carbon because these model variables are conservative (Humphreys et al., 2018), and both are transported with the water (i.e., differences in molecular diffusion among the species involved do not matter in advection dominated systems). In non-permeable sediments, molecular diffusion dominates transport and species diffuse according to their own gradient (e.g., the gradient of carbon dioxide may differ from that of the carbonate ion). Moreover, species may have different diffusion coefficients. Consequently, a more accurate way to represent the carbonate system in non-permeable sediments is to have transport-reaction equations for all species involved (e.g., protons, bicarbonate, carbonate, carbon dioxide). The most accurate way would be to include also changes in complex formation and electroneutrality constraints (Boudreau et al., 2004).

However, this gain in model accuracy comes at the expense of model complexity and computational demand, while the uncertainty due to lumping carbonic acid, bicarbonate and carbonate transport is usually less than other uncertainties related to thermodynamic constants needed in the calculation and tortuosity corrections for diffusion coefficients. Most of the uncertainty surrounding  $\text{CaCO}_3$  saturation state estimates stems from the large uncertainty within the  $\text{CaCO}_3$  equilibrium constants rather than that associated with carbonate ion (Orr et al., 2018; Sulpis et al., 2020); this uncertainty is independent of the transport modelling approach used.

$\text{HCO}_3^-$  is the dominant dissolved inorganic carbon species at pH values typical of porewaters, see Fig. S2. In Fig. S2, we show what the diffusion of DIC would be if it was computed as a weighted arithmetic average of the diffusion coefficients of each of the DIC components. At pH  $\sim 7$ , the ‘true’ DIC diffusion coefficient (the weighted arithmetic average) is about 4% higher than the diffusion coefficient of  $\text{HCO}_3^-$  alone. That gap becomes negligible at higher pH. Thus, using the  $\text{HCO}_3^-$  diffusion coefficient as a surrogate for that of TAlk and DIC, as it has been done by other, similar models, such as that of Kanzaki et al. (2021), should be acceptable if the pH is not too low.

**Table S1. Environmental conditions, bottom-water and sediment properties for the North-western Atlantic Ocean station.**

| <b>Variable</b>                                                                           | <b>Value</b>                                                    | <b>Source</b>                                |
|-------------------------------------------------------------------------------------------|-----------------------------------------------------------------|----------------------------------------------|
| Station ID                                                                                | Station #9                                                      | Hales et al. (1994)                          |
| Location                                                                                  | North Atlantic                                                  | Hales et al. (1994)                          |
| Coordinates                                                                               | 34.33N / 70.35W                                                 | Hales et al. (1994)                          |
| Depth                                                                                     | 5210 m                                                          | Hales et al. (1994)                          |
| Temperature                                                                               | 2.2 °C                                                          | Hales et al. (1994)                          |
| Salinity                                                                                  | 34.9                                                            | Hales et al. (1994)                          |
| DBL thickness                                                                             | 938 $\mu\text{m}$                                               | Sulpis et al. (2018)                         |
| <b><i>Solid fluxes to the seafloor (<math>\text{mol m}^{-2} \text{a}^{-1}</math>)</i></b> |                                                                 |                                              |
| POC flux ( $F_{\text{POC}}$ )                                                             | 0.18<br>(6.0 g POM $\text{m}^2 \text{a}^{-1}$ )                 | Hales et al. (1994)                          |
| Fast-decay POC                                                                            | 0.70 x $F_{\text{POC}}$                                         | Assumed                                      |
| Slow-decay POC                                                                            | 0.27 x $F_{\text{POC}}$                                         | Assumed                                      |
| Refractory POC                                                                            | 0.03 x $F_{\text{POC}}$                                         | Assumed                                      |
| CaCO <sub>3</sub> flux ( $F_{\text{CaCO}_3}$ )                                            | 0.20<br>(20.02 g CaCO <sub>3</sub> $\text{m}^2 \text{a}^{-1}$ ) | Hales et al. (1994)                          |
| Calcite                                                                                   | $F_{\text{CaCO}_3}$                                             | Assumed                                      |
| Aragonite                                                                                 | 0                                                               | Assumed                                      |
| MnO <sub>2</sub> flux ( $F_{\text{MnO}_2}$ )                                              | 0.0005                                                          | Assumed                                      |
| Fe(OH) <sub>3</sub> flux ( $F_{\text{Fe(OH)}_3}$ )                                        | 0.0005                                                          | Assumed                                      |
| FeS flux ( $F_{\text{FeS}}$ )                                                             | 0                                                               | Boudreau (1996)                              |
| <b><i>Sediment surface properties</i></b>                                                 |                                                                 |                                              |
| Surface [CaCO <sub>3</sub> ]                                                              | 27 dry wt %                                                     | Hales et al. (1994)                          |
| Surface [POC]                                                                             | 0.31 dry wt %                                                   | Hales et al. (1994)                          |
| Clay flux                                                                                 | 26 g $\text{m}^{-2} \text{a}^{-1}$                              | Assumed                                      |
| Surface porosity                                                                          | 0.91                                                            | Assumed                                      |
| Porosity at depth                                                                         | 0.74                                                            | Assumed                                      |
| <b><i>Bottom-water chemistry</i></b>                                                      |                                                                 |                                              |
| TAlk                                                                                      | 2342 $\mu\text{mol kg}^{-1}$                                    | Hales et al. (1994)                          |
| $\Sigma\text{CO}_2$                                                                       | 2186 $\mu\text{mol kg}^{-1}$                                    | Hales et al. (1994)                          |
| [O <sub>2</sub> ]                                                                         | 266.6 $\mu\text{mol kg}^{-1}$                                   | Hales et al. (1994)                          |
| [ $\Sigma\text{NO}_3$ ]                                                                   | 20.0668 $\mu\text{mol kg}^{-1}$                                 | GLODAPv2 (Lauvset et al., 2016)              |
| [ $\Sigma\text{SO}_4$ ]                                                                   | 29.180 mmol $\text{kg}^{-1}$                                    | Computed from S (Millero, 2013)              |
| [ $\Sigma\text{PO}_4$ ]                                                                   | 1.3561 $\mu\text{mol kg}^{-1}$                                  | GLODAPv2 (Lauvset et al., 2016)              |
| [ $\Sigma\text{NH}_4$ ]                                                                   | 0                                                               | Assumed                                      |
| [ $\Sigma\text{H}_2\text{S}$ ]                                                            | 0                                                               | Assumed                                      |
| [Mn <sup>2+</sup> ]                                                                       | 0.5 nmol $\text{kg}^{-1}$                                       | Typical deep-sea value (Morton et al., 2019) |
| [Fe <sup>2+</sup> ]                                                                       | 0.5 nmol $\text{kg}^{-1}$                                       | Typical deep-sea value (Abadie et al., 2017) |
| [Ca <sup>2+</sup> ]                                                                       | 10.255 mmol $\text{kg}^{-1}$                                    | Computed from S (Riley and Tongudai, 1967)   |
| [CO <sub>3</sub> <sup>2-</sup> ] <sub>sw</sub> ( $\mu\text{mol kg}^{-1}$ )                | 102.6 $\mu\text{mol kg}^{-1}$                                   | Computed (RADI)                              |
| [CO <sub>3</sub> <sup>2-</sup> ] <sub>eq Calcite</sub> ( $\mu\text{mol kg}^{-1}$ )        | 117.6 $\mu\text{mol kg}^{-1}$                                   | Computed (RADI)                              |
| [CO <sub>3</sub> <sup>2-</sup> ] <sub>eq Arag.</sub> ( $\mu\text{mol kg}^{-1}$ )          | 175.5 $\mu\text{mol kg}^{-1}$                                   | Computed (RADI)                              |
| $\Omega_{ca}$                                                                             | 0.88                                                            | Computed (RADI)                              |
| $\Omega_{ar}$                                                                             | 0.59                                                            | Computed (RADI)                              |

**Table S2. Environmental conditions, bottom-water and sediment properties for the Southern Pacific station.**

| <b>Variable</b>                                                                           | <b>Value</b>                                                    | <b>Source</b>                                     |
|-------------------------------------------------------------------------------------------|-----------------------------------------------------------------|---------------------------------------------------|
| Station ID                                                                                | Station #7.3                                                    | Sayles et al. (2001)                              |
| Location                                                                                  | Southern Pacific                                                | Sayles et al. (2001)                              |
| Coordinates                                                                               | 60.15S / 170.11W                                                | Sayles et al. (2001)                              |
| Depth                                                                                     | 3860 m                                                          | Sayles et al. (2001)                              |
| Temperature                                                                               | 0.84 °C                                                         | Sayles et al. (2001)                              |
| Salinity                                                                                  | 34.696                                                          | Sayles et al. (2001)                              |
| DBL thickness                                                                             | 715 $\mu\text{m}$                                               | Sulpis et al. (2018)                              |
| <b><i>Solid fluxes to the seafloor (<math>\text{mol m}^{-2} \text{a}^{-1}</math>)</i></b> |                                                                 |                                                   |
| POC flux ( $F_{\text{POC}}$ )                                                             | 0.138<br>(4.6 g POM $\text{m}^2 \text{a}^{-1}$ )                | Assumed                                           |
| Fast-decay POC                                                                            | 0.70 x $F_{\text{POC}}$                                         | Assumed                                           |
| Slow-decay POC                                                                            | 0.27 x $F_{\text{POC}}$                                         | Assumed                                           |
| Refractory POC                                                                            | 0.03 x $F_{\text{POC}}$                                         | Assumed                                           |
| CaCO <sub>3</sub> flux ( $F_{\text{CaCO}_3}$ )                                            | 0.25<br>(25.02 g CaCO <sub>3</sub> $\text{m}^2 \text{a}^{-1}$ ) | Assumed                                           |
| Calcite                                                                                   | $F_{\text{CaCO}_3}$                                             | Assumed                                           |
| Aragonite                                                                                 | 0                                                               | Assumed                                           |
| MnO <sub>2</sub> flux ( $F_{\text{MnO}_2}$ )                                              | 0.0005                                                          | Assumed                                           |
| Fe(OH) <sub>3</sub> flux ( $F_{\text{Fe(OH)}_3}$ )                                        | 0.0005                                                          | Assumed                                           |
| FeS flux ( $F_{\text{FeS}}$ )                                                             | 0                                                               | Boudreau (1996)                                   |
| <b><i>Sediment surface properties</i></b>                                                 |                                                                 |                                                   |
| Surface [CaCO <sub>3</sub> ]                                                              | 37.7 dry wt %                                                   | Sayles et al. (2001)                              |
| Surface [POC]                                                                             | 0.37 dry wt %                                                   | Sayles et al. (2001)                              |
| Clay flux                                                                                 | 32 g $\text{m}^{-2} \text{a}^{-1}$                              | Sayles et al. (2001), November – February average |
| Surface porosity                                                                          | 0.91                                                            | Sayles et al. (2001)                              |
| Porosity at depth                                                                         | 0.87                                                            | Assumed                                           |
| <b><i>Bottom-water chemistry</i></b>                                                      |                                                                 |                                                   |
| TAlk                                                                                      | 2365 $\mu\text{mol kg}^{-1}$                                    | GLODAPv2 (Lauvset et al., 2016)                   |
| $\Sigma\text{CO}_2$                                                                       | 2260 $\mu\text{mol kg}^{-1}$                                    | GLODAPv2 (Lauvset et al., 2016)                   |
| [O <sub>2</sub> ]                                                                         | 215.7 $\mu\text{mol kg}^{-1}$                                   | GLODAPv2 (Lauvset et al., 2016)                   |
| [ $\Sigma\text{NO}_3$ ]                                                                   | 32.2416 $\mu\text{mol kg}^{-1}$                                 | GLODAPv2 (Lauvset et al., 2016)                   |
| [ $\Sigma\text{SO}_4$ ]                                                                   | 29.010 mmol $\text{kg}^{-1}$                                    | Computed from S (Millero, 2013)                   |
| [ $\Sigma\text{PO}_4$ ]                                                                   | 2.2428 $\mu\text{mol kg}^{-1}$                                  | GLODAPv2 (Lauvset et al., 2016)                   |
| [ $\Sigma\text{NH}_4$ ]                                                                   | 0                                                               | Assumed                                           |
| [ $\Sigma\text{H}_2\text{S}$ ]                                                            | 0                                                               | Assumed                                           |
| [Mn <sup>2+</sup> ]                                                                       | 0.5 nmol $\text{kg}^{-1}$                                       | Typical deep-sea value (Morton et al., 2019)      |
| [Fe <sup>2+</sup> ]                                                                       | 0.5 nmol $\text{kg}^{-1}$                                       | Typical deep-sea value (Abadie et al., 2017)      |
| [Ca <sup>2+</sup> ]                                                                       | 10.196 mmol $\text{kg}^{-1}$                                    | Computed from S (Riley and Tongudai, 1967)        |
| [CO <sub>3</sub> <sup>2-</sup> ] <sub>sw</sub> ( $\mu\text{mol kg}^{-1}$ )                | 77.5 $\mu\text{mol kg}^{-1}$                                    | Computed (RADI)                                   |
| [CO <sub>3</sub> <sup>2-</sup> ] <sub>eq Calcite</sub> ( $\mu\text{mol kg}^{-1}$ )        | 91.7 $\mu\text{mol kg}^{-1}$                                    | Computed (RADI)                                   |
| [CO <sub>3</sub> <sup>2-</sup> ] <sub>eq Arag.</sub> ( $\mu\text{mol kg}^{-1}$ )          | 138.9 $\mu\text{mol kg}^{-1}$                                   | Computed (RADI)                                   |
| $\Omega_{ca}$                                                                             | 0.85                                                            | Computed (RADI)                                   |
| $\Omega_{ar}$                                                                             | 0.56                                                            | Computed (RADI)                                   |

**Table S3. Environmental conditions, bottom-water and sediment properties for the Central Equatorial Pacific station.**

| <b>Variable</b>                                                                 | <b>Value</b>                                                        | <b>Source</b>                                  |
|---------------------------------------------------------------------------------|---------------------------------------------------------------------|------------------------------------------------|
| Station ID                                                                      | Station #W-2                                                        | Berelson et al. (1994) / Hammond et al. (1996) |
| Location                                                                        | Equatorial Pacific                                                  | Berelson et al. (1994) / Hammond et al. (1996) |
| Coordinates                                                                     | 0.0N / 139.9W                                                       | Berelson et al. (1994) / Hammond et al. (1996) |
| Depth                                                                           | 4370 m                                                              | Berelson et al. (1994) / Hammond et al. (1996) |
| Temperature                                                                     | 1.4 °C                                                              | GLODAPv2 (Lauvset et al., 2016)                |
| Salinity                                                                        | 34.69                                                               | GLODAPv2 (Lauvset et al., 2016)                |
| DBL thickness                                                                   | 1 mm                                                                | Assumed                                        |
| <b><i>Solid fluxes to the seafloor (mol m<sup>-2</sup> a<sup>-1</sup>)</i></b>  |                                                                     |                                                |
| POC flux ( $F_{\text{POC}}$ )                                                   | 0.20<br>(6.6 g POM m <sup>2</sup> a <sup>-1</sup> )                 | Assumed                                        |
| Fast-decay POC                                                                  | 0.70 x $F_{\text{POC}}$                                             | Assumed                                        |
| Slow-decay POC                                                                  | 0.27 x $F_{\text{POC}}$                                             | Assumed                                        |
| Refractory POC                                                                  | 0.03 x $F_{\text{POC}}$                                             | Assumed                                        |
| CaCO <sub>3</sub> flux ( $F_{\text{CaCO}_3}$ )                                  | 0.22<br>(22.02 g CaCO <sub>3</sub> m <sup>2</sup> a <sup>-1</sup> ) | Assumed                                        |
| Calcite                                                                         | $F_{\text{CaCO}_3}$                                                 | Assumed                                        |
| Aragonite                                                                       | 0                                                                   | Assumed                                        |
| MnO <sub>2</sub> flux ( $F_{\text{MnO}_2}$ )                                    | 0.0005                                                              | Assumed                                        |
| Fe(OH) <sub>3</sub> flux ( $F_{\text{Fe(OH)}_3}$ )                              | 0.0005                                                              | Assumed                                        |
| FeS flux ( $F_{\text{FeS}}$ )                                                   | 0                                                                   | Boudreau (1996)                                |
| <b><i>Sediment surface properties</i></b>                                       |                                                                     |                                                |
| Surface [CaCO <sub>3</sub> ]                                                    | 76.1 dry wt %                                                       | Hammond et al (1996) Table 1                   |
| Surface [POC]                                                                   | 0.24 dry wt %                                                       | Hammond et al (1996) Table 1                   |
| Clay flux                                                                       | 2 g m <sup>-2</sup> a <sup>-1</sup>                                 | Hammond et al (1996)                           |
| Surface porosity                                                                | 0.85                                                                | Hammond et al (1996)                           |
| Porosity at depth                                                               | 0.74 (4cm)                                                          | Berelson et al. (1994)                         |
| <b><i>Bottom-water chemistry</i></b>                                            |                                                                     |                                                |
| TAlk                                                                            | 2426.0 μmol kg <sup>-1</sup>                                        | GLODAPv2 (Lauvset et al., 2016)                |
| ΣCO <sub>2</sub>                                                                | 2324.3 μmol kg <sup>-1</sup>                                        | GLODAPv2 (Lauvset et al., 2016)                |
| [O <sub>2</sub> ]                                                               | 159.7 μmol kg <sup>-1</sup>                                         | GLODAPv2 (Lauvset et al., 2016)                |
| [ΣNO <sub>3</sub> ]                                                             | 36.93 μmol kg <sup>-1</sup>                                         | GLODAPv2 (Lauvset et al., 2016)                |
| [ΣSO <sub>4</sub> ]                                                             | 29.005 mmol kg <sup>-1</sup>                                        | Computed from S (Millero, 2013)                |
| [ΣPO <sub>4</sub> ]                                                             | 2.39 μmol kg <sup>-1</sup>                                          | GLODAPv2 (Lauvset et al., 2016)                |
| [ΣNH <sub>4</sub> ]                                                             | 0                                                                   | Assumed                                        |
| [ΣH <sub>2</sub> S]                                                             | 0                                                                   | Assumed                                        |
| [Mn <sup>2+</sup> ]                                                             | 0.5 nmol kg <sup>-1</sup>                                           | Typical deep-sea value (Morton et al., 2019)   |
| [Fe <sup>2+</sup> ]                                                             | 0.5 nmol kg <sup>-1</sup>                                           | Typical deep-sea value (Abadie et al., 2017)   |
| [Ca <sup>2+</sup> ]                                                             | 10.193 mmol kg <sup>-1</sup>                                        | Computed from S (Riley and Tongudai, 1967)     |
| [CO <sub>3</sub> <sup>2-</sup> ] <sub>sw</sub> (μmol kg <sup>-1</sup> )         | 77.9 μmol kg <sup>-1</sup>                                          | Computed (RADI)                                |
| [CO <sub>3</sub> <sup>2-</sup> ] <sub>eq Calcite</sub> (μmol kg <sup>-1</sup> ) | 100.0 μmol kg <sup>-1</sup>                                         | Computed (RADI)                                |
| [CO <sub>3</sub> <sup>2-</sup> ] <sub>eq Arag.</sub> (μmol kg <sup>-1</sup> )   | 150.7 μmol kg <sup>-1</sup>                                         | Computed (RADI)                                |
| Ω <sub>ca</sub>                                                                 | 0.78                                                                | Computed (RADI)                                |
| Ω <sub>ar</sub>                                                                 | 0.52                                                                | Computed (RADI)                                |

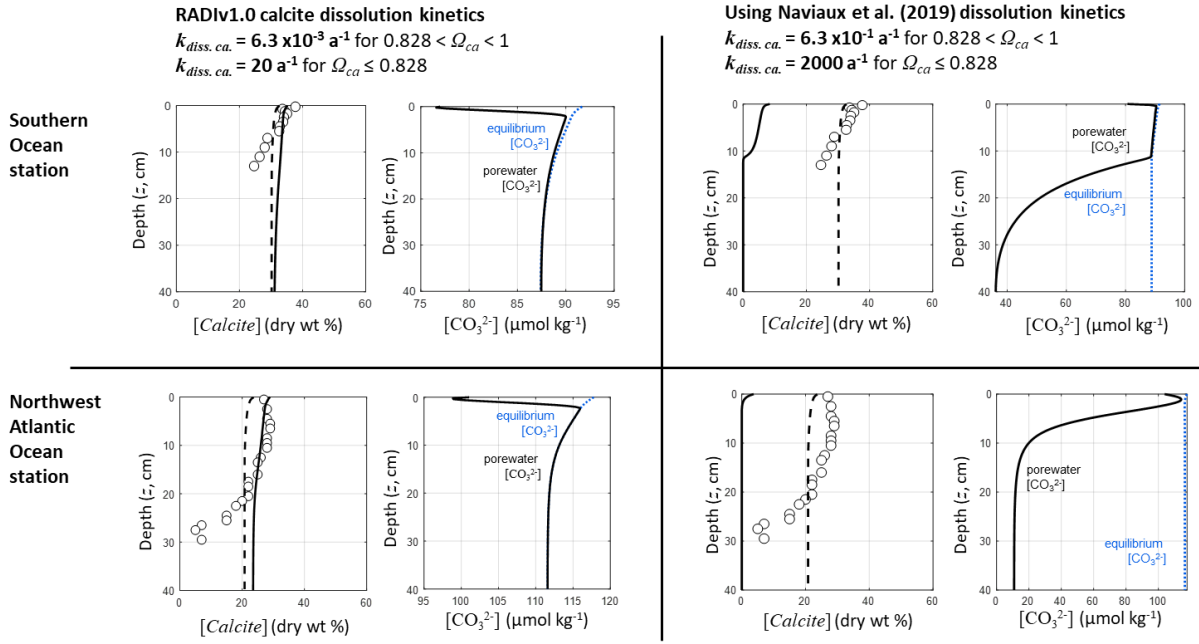

**Figure S1.** Comparison of predicted calcite and  $\text{CO}_3^{2-}$  concentration profiles using the calcite dissolution kinetics implemented in RADiv1 (left) and using the rate constants from the original publication (Naviaux et al., 2019a) coupled with the surface area of foraminifera ( $400 \text{ m}^2 \text{ mol}^{-1}$ , from Subhas et al., 2018). The dashed line represents results from the MUDS model.

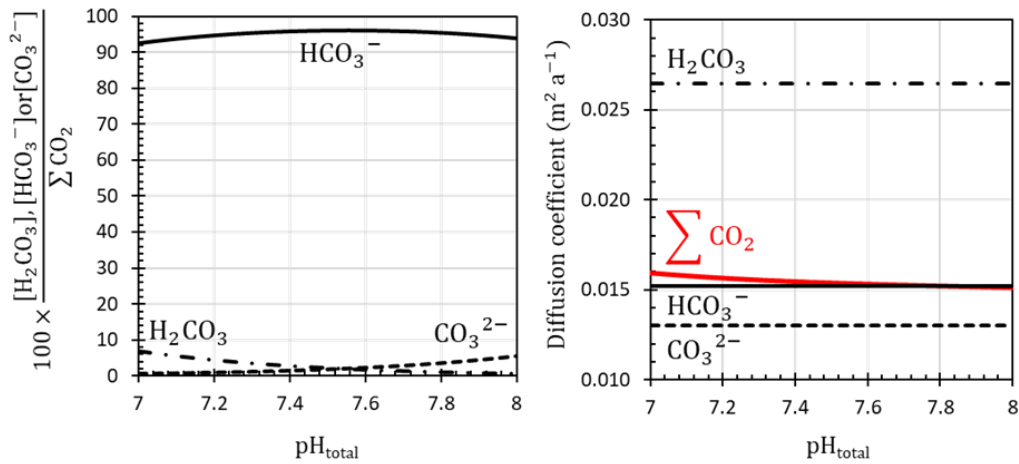

**Figure S2.** (left) Relative proportion of each of the three species constituting  $\Sigma\text{CO}_2$  as a function of seawater pH, expressed on the total scale. (right) Diffusion coefficients of each of the three species constituting  $\Sigma\text{CO}_2$ , as well as of  $\Sigma\text{CO}_2$  itself when computed as an weighted arithmetic average of the diffusion coefficients of each of its constituting species, as a function of seawater pH expressed on the total scale.



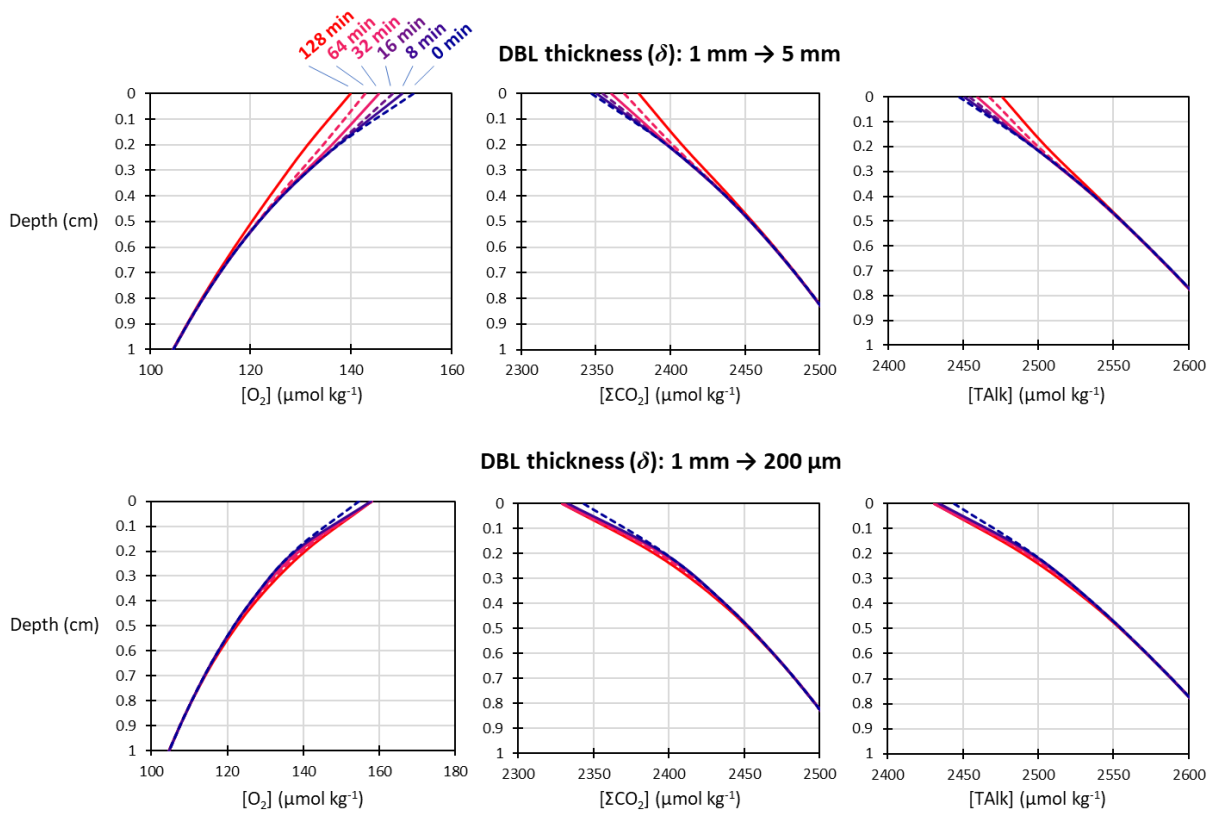

**Figure S3.** Porewater [O<sub>2</sub>], ΣCO<sub>2</sub> and TAlk depth profiles as a function of time following an instantaneous change in the diffusive boundary layer thickness ( $\delta$ ).

## Supplementary references

- Abadie, C., Lacan, F., Radic, A., Pradoux, C. and Poitrasson, F. (2017) Iron isotopes reveal distinct dissolved iron sources and pathways in the intermediate versus deep Southern Ocean. *Proceedings of the National Academy of Sciences* 114, 858-863.
- Berelson, W.M., Hammond, D.E., McManus, J. and Kilgore, T.E. (1994) Dissolution kinetics of calcium carbonate in equatorial Pacific sediments. *Global Biogeochemical Cycles* 8, 219-235.
- Boudreau, B.P. (1996) A method-of-lines code for carbon and nutrient diagenesis in aquatic sediments. *Computers & Geosciences* 22, 479-496.
- Boudreau, B.P. (1997) *Diagenetic Models and Their Implementation*. Springer-Verlag, Berlin, 414 pp. 1997
- Boudreau, B.P., Meysman, F.J.R., Middelburg, J.J. (2004) Multicomponent ionic diffusion in porewaters: Coulombic effects revisited. *Earth and Planetary Science Letters*, 222, 653-666.
- Hales, B., Emerson, S. and Archer, D. (1994) Respiration and dissolution in the sediments of the western North Atlantic: estimates from models of in situ microelectrode measurements of porewater oxygen and pH. *Deep Sea Research Part I: Oceanographic Research Papers* 41, 695-719.
- Hammond, D.E., McManus, J., Berelson, W.M., Kilgore, T.E. and Pope, R.H. (1996) Early diagenesis of organic material in equatorial Pacific sediments: stoichiometry and kinetics. *Deep Sea Research Part II: Topical Studies in Oceanography* 43, 1365-1412.
- Hofmann, A.F., Meysman, F.J.R., Soetaert, K., Middelburg, J.J. (2008) A step-by-step procedure for pH model construction in aquatic systems. *Biogeosciences* 5, 227-251.
- Humphreys, M.P., Daniels, C.J., Wolf-Gladrow, D.A., Tyrrell, T., Achterberg, E.P. (2018) On the influence of marine biogeochemical processes over CO<sub>2</sub> exchange between the atmosphere and ocean. *Marine Chemistry*, 199, 1-11.
- Kanzaki, Y., Hülse, D., Turner, S.K., Ridgwell, A. (2021) A model for marine sedimentary carbonate diagenesis and paleoclimate proxy signal tracking: IMP v1.0. *Geoscientific Model Development*, 14, 5999-6023.
- Lauvset, S.K., Key, R.M., Olsen, A., van Heuven, S., Velo, A., Lin, X., Schirnick, C., Kozyr, A., Tanhua, T., Hoppema, M., Jutterström, S., Steinfeldt, R., Jeansson, E., Ishii, M., Perez, F.F., Suzuki, T. and Watelet, S. (2016) A new global interior ocean mapped climatology: the 1° × 1° GLODAP version 2. *Earth System Science Data* 8, 325-340.
- Millero, F.J. (2013) *Chemical Oceanography*, Fourth Edition. CRC Press - Taylor & Francis Group, Boca Raton.
- Morton, P.L., Landing, W.M., Shiller, A.M., Moody, A., Kelly, T.D., Bizimis, M., Donat, J.R., De Carlo, E.H. and Shacat, J. (2019) Shelf Inputs and Lateral Transport of Mn, Co, and Ce in the Western North Pacific Ocean. *Frontiers in Marine Science* 6.
- Naviaux, J.D., Subhas, A.V., Dong, S., Rollins, N.E., Liu, X., Byrne, R.H., Berelson, W.M. and Adkins, J.F. (2019a) Calcite dissolution rates in seawater: Lab vs. in-situ measurements and inhibition by organic matter. *Marine Chemistry* 215.
- Orr, J. C., Epitalon, J.-M., Dickson, A. G., and Gattuso, J.-P. (2018) Routine uncertainty propagation for the marine carbon dioxide system, *Mar. Chem.*, 207, 84–107.

Riley, J.P. and Tongudai, M. (1967) The major cation/chlorinity ratios in sea water. *Chemical Geology* 2, 263-269.

Sayles, F.L., Martin, W.R., Chase, Z. and Anderson, R.F. (2001) Benthic remineralization and burial of biogenic SiO<sub>2</sub>, CaCO<sub>3</sub>, organic carbon, and detrital material in the Southern Ocean along a transect at 170 West. *Deep Sea Research II* 48, 4323-4383.

Subhas, A.V., Rollins, N.E., Berelson, W.M., Erez, J., Ziveri, P., Langer, G. and Adkins, J.F. (2018) The dissolution behavior of biogenic calcites in seawater and a possible role for magnesium and organic carbon. *Marine Chemistry* 205, 100-112.

Sulpis, O., Boudreau, B.P., Mucci, A., Jenkins, C.J., Trossman, D.S., Arbic, B.K. and Key, R.M. (2018) Current CaCO<sub>3</sub> dissolution at the seafloor caused by anthropogenic CO<sub>2</sub>. *Proceedings of the National Academy of Sciences* 115, 11700-11705.

Sulpis, O., Lauvset, S.K., Hagens, M. (2020) Current estimates of K<sub>1</sub>\* and K<sub>2</sub>\* appear inconsistent with measured CO<sub>2</sub> system parameters in cold oceanic regions. *Ocean Science* 16(4), 847-862.
